# Supplementary material
Source: PubMed Central journal article supplement (PMC7242139)

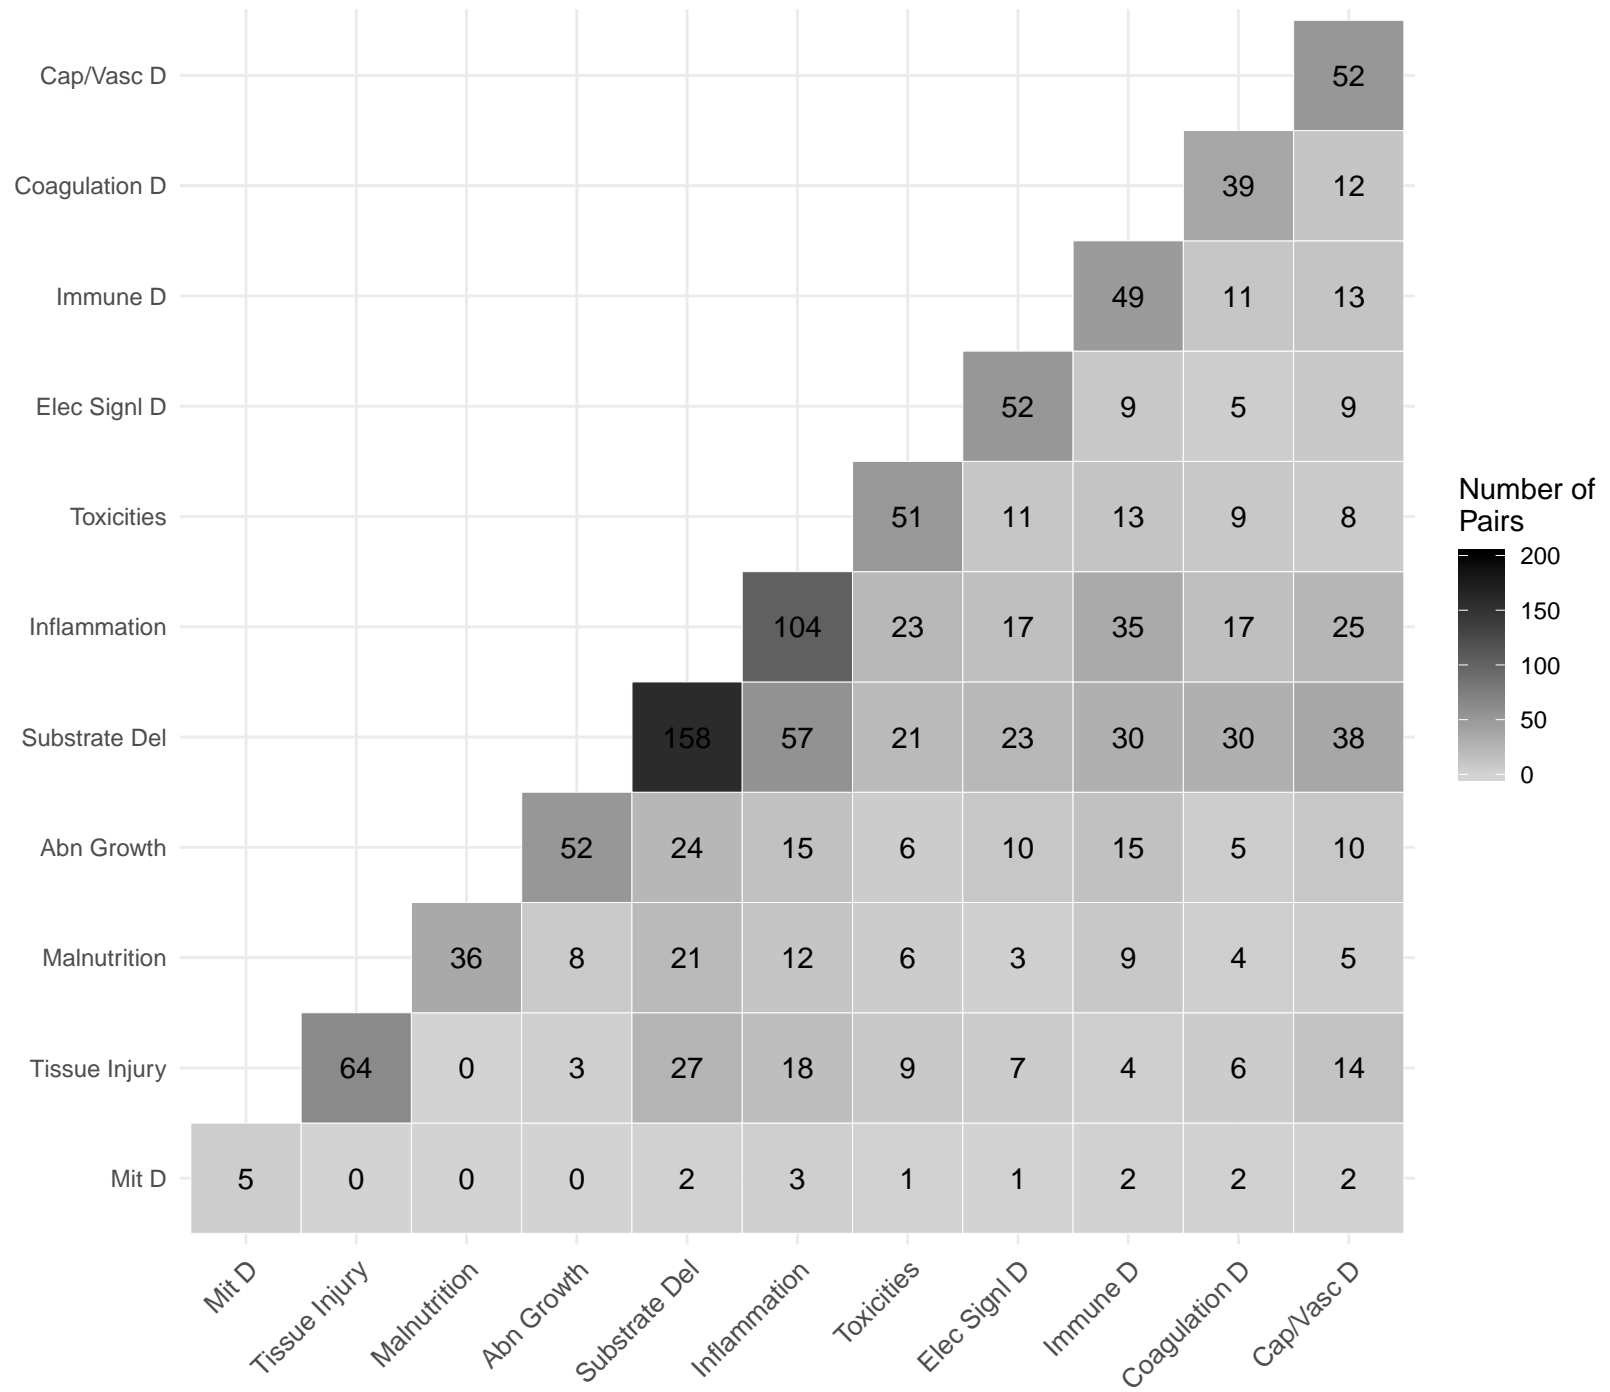

Supplement: NIHMS1574289-supplement-Supplemental_Data_File___doc___tif__pdf__etc___2.pdf [file NIHMS1574289-supplement-Supplemental_Data_File___doc___tif__pdf__etc___2.pdf]

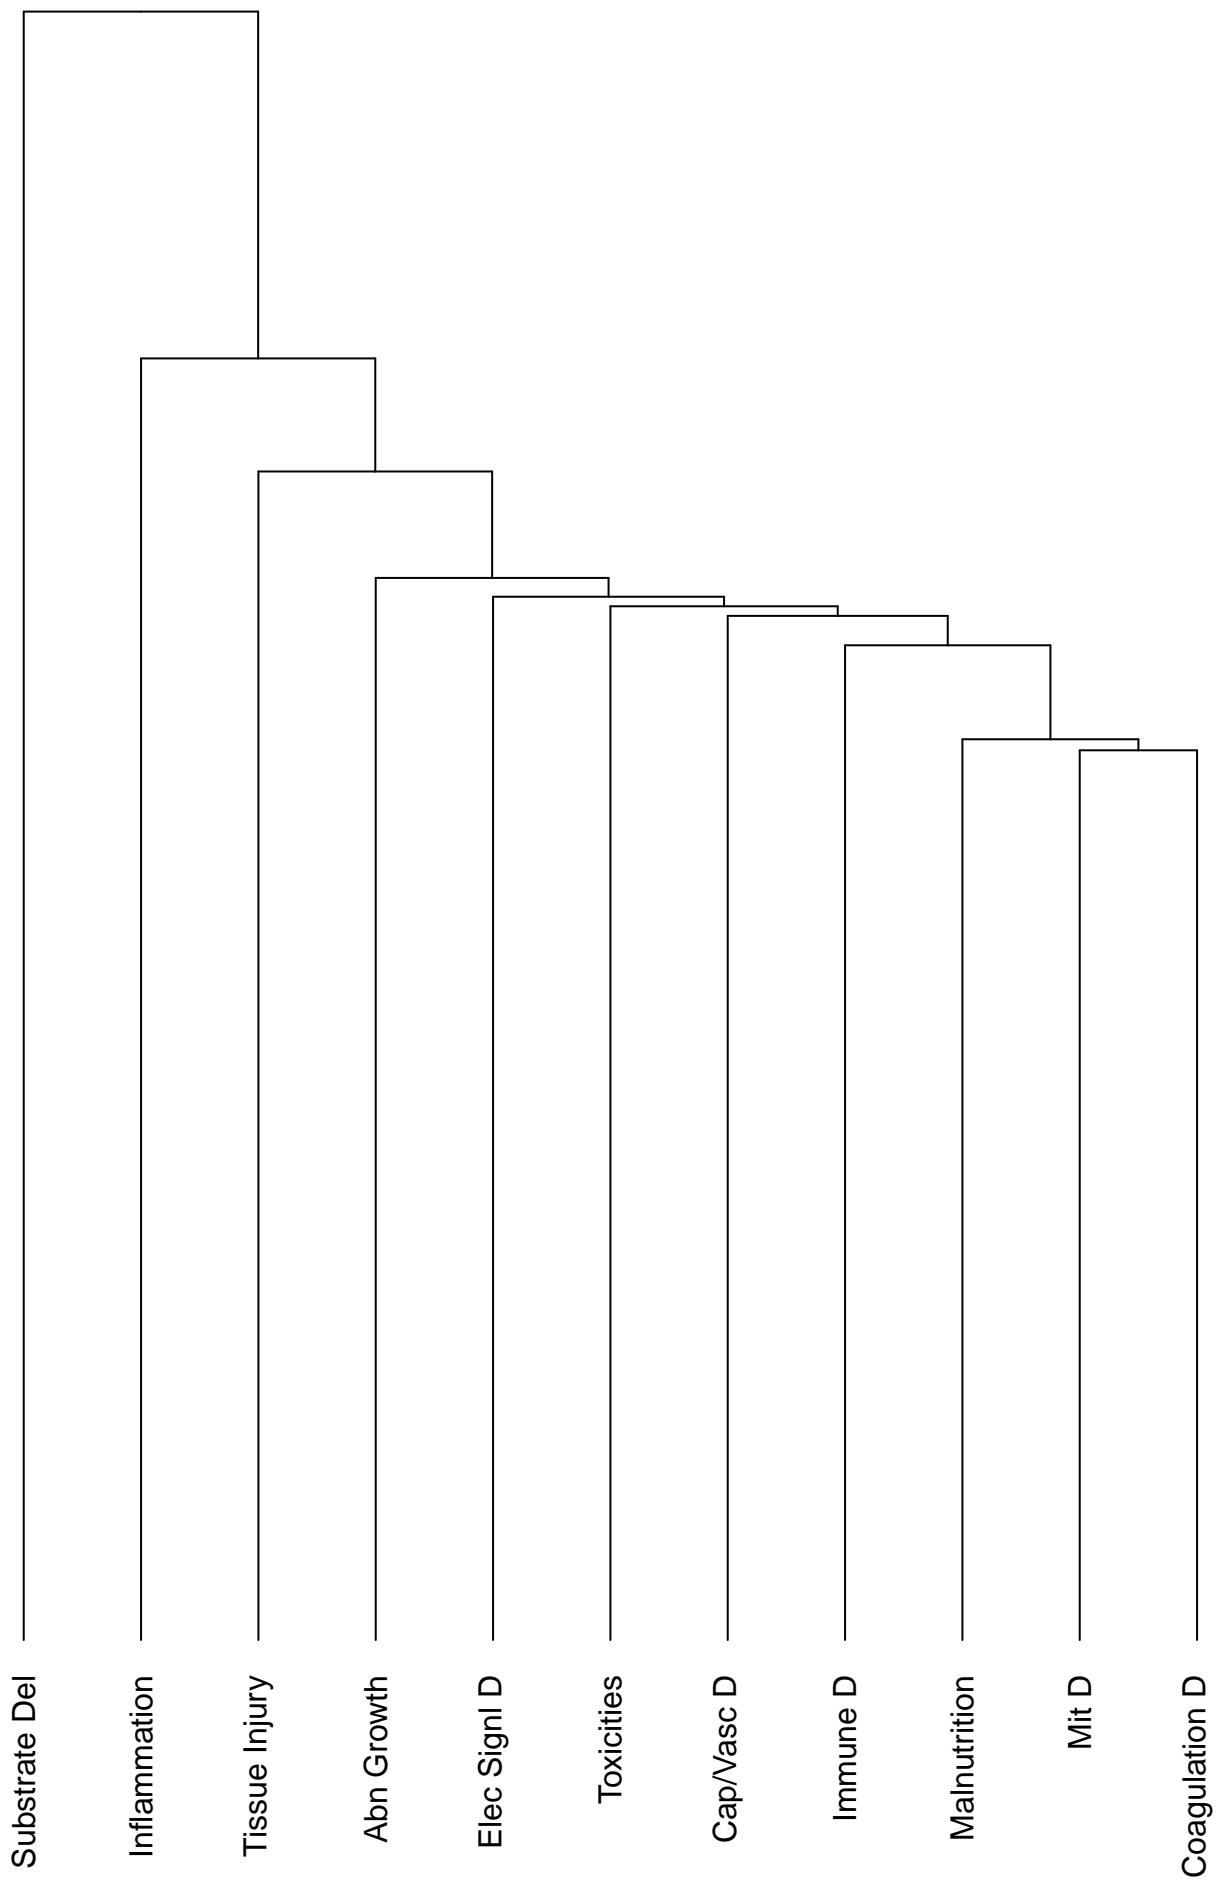

Supplement: NIHMS1574289-supplement-Supplemental_Data_File___doc___tif__pdf__etc___4.pdf [file NIHMS1574289-supplement-Supplemental_Data_File___doc___tif__pdf__etc___4.pdf]

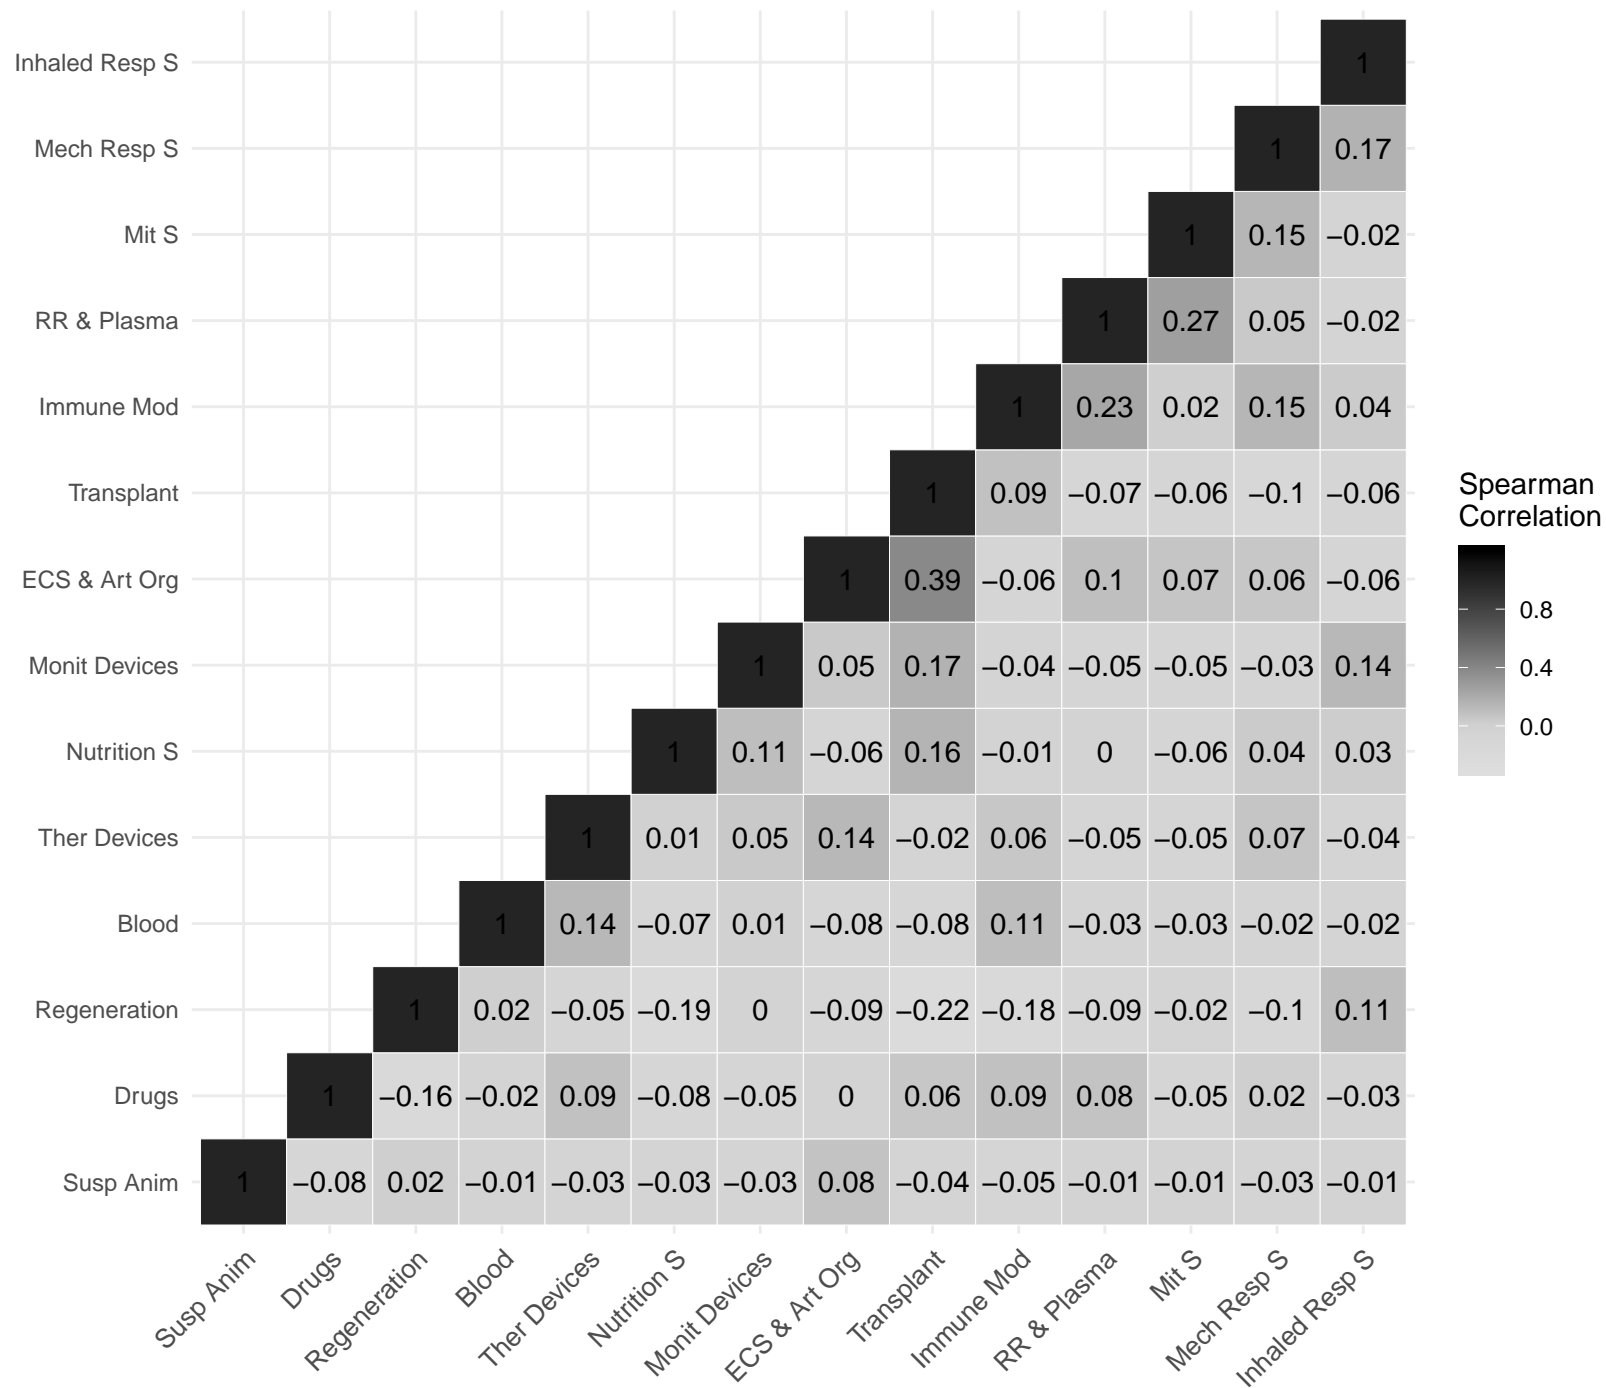

Supplement: NIHMS1574289-supplement-Supplemental_Data_File___doc___tif__pdf__etc___6.pdf [file NIHMS1574289-supplement-Supplemental_Data_File___doc___tif__pdf__etc___6.pdf]

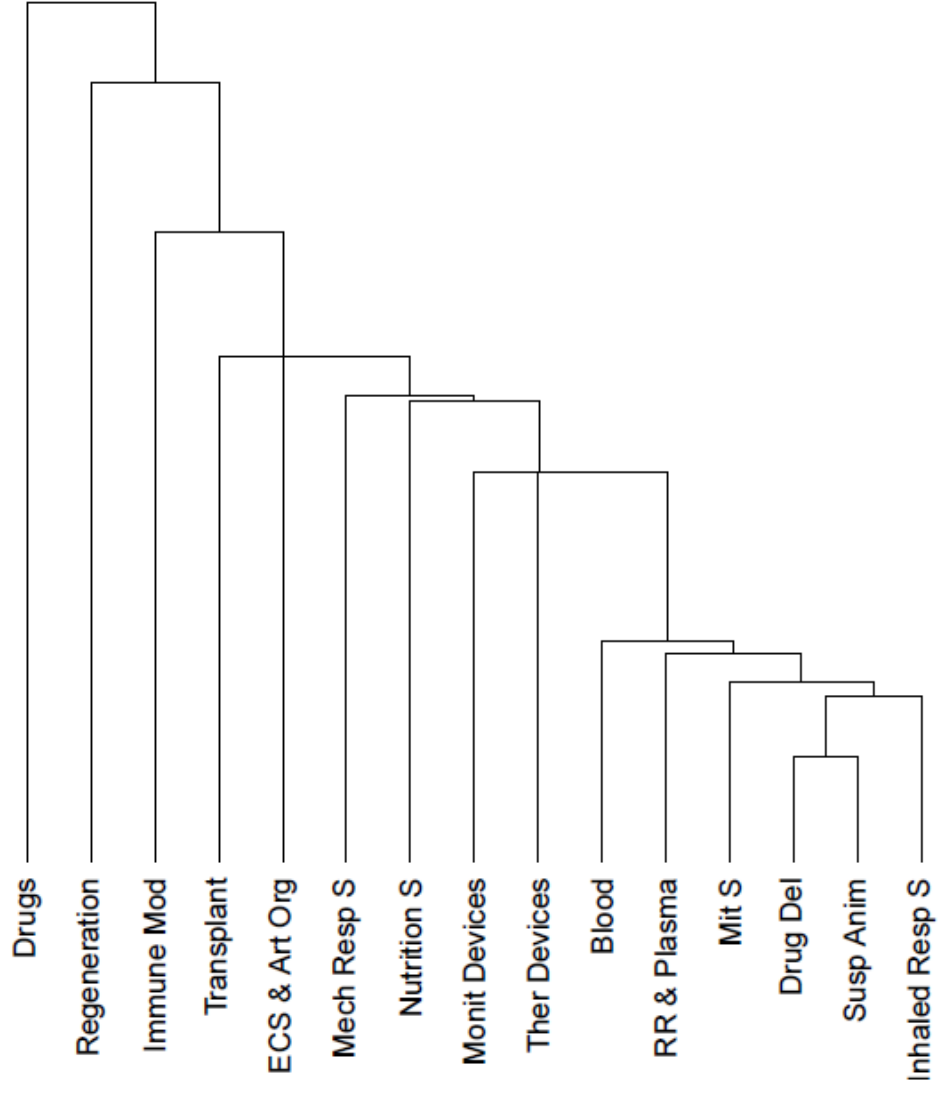

Supplement: NIHMS1574289-supplement-Supplemental_Data_File___doc___tif__pdf__etc___7.pdf [file NIHMS1574289-supplement-Supplemental_Data_File___doc___tif__pdf__etc___7.pdf]
